# Supplementary material for: Different Traits Determine Introduction, Naturalization and Invasion Success In Woody Plants: Proteaceae as a Test Case
Source: PLoS One. 2013 Sep 24;8(9):e75078. doi: 10.1371/journal.pone.0075078 (PMC3782508; doi:10.1371/journal.pone.0075078)
Supplement: Table S2 — Reference list of species names and synonyms. (XLS) [file pone.0075078.s005.xls]

## Sheet: Metadata
Database compiled by Desika Moodley (Centre for Invasion Biology, Stellenbosch University).
E-mail: desikamoodley29@gmail.com
This database forms part of my masters research project.
Last updated: 12 June 2012
Proteaceae species list worksheet (Table S2a)
Reference list of all Proteaceae identified in this study
Synonym worksheet (Table S2b)
List of name changes encountered while compiling the species list and searching for species introduced globally. Hence, synonyms for the entire family is not included.
In addition, this list includes Dryandra under the genus Banksia. This is a result of the taxonomic arrangement which transferred Dryandra to Banksia (Mast, A.R. and Thiele, K. 2007. The transfer of Dryandra R. Br. to Banksia L.f. (Proteaceae). Australian Systematic Botany, 20: 63–71.).

## Sheet: Proteaceae species list_S2a
Table S2a. A reference list of all Proteaceae species identified in this study
Genus	Species
Acidonia	microcarpa
Adenanthos	acanthophyllus
Adenanthos	apiculatus
Adenanthos	argyreus
Adenanthos	cacomorphus
Adenanthos	cuneatus
Adenanthos	cygnorum
Adenanthos	detmoldii
Adenanthos	dobagii
Adenanthos	dobsonii
Adenanthos	drummondii
Adenanthos	ellipticus
Adenanthos	eyrei
Adenanthos	filifolius
Adenanthos	flavidiflorus
Adenanthos	forrestii
Adenanthos	glabrescens
Adenanthos	gracilipes
Adenanthos	ileticos
Adenanthos	labillardierei
Adenanthos	linearis
Adenanthos	macropodianus
Adenanthos	meisneri
Adenanthos	obovatus
Adenanthos	oreophilus
Adenanthos	pungens
Adenanthos	sericeus
Adenanthos	strictus
Adenanthos	terminalis
Adenanthos	velutinus
Adenanthos	venosus
Agastachys	odorata
Alloxylon	brachycarpum
Alloxylon	flammeum
Alloxylon	pinnatum
Alloxylon	wickhamii
Athertonia	diversifolia
Aulax	cancellata
Aulax	pallasia
Aulax	umbellata
Austromuellera	trinervia
Austromuellera	valida
Banksia	aculeata
Banksia	aemula
Banksia	aquilonia
Banksia	ashbyi
Banksia	attenuata
Banksia	audax
Banksia	baueri
Banksia	baxteri
Banksia	benthamiana
Banksia	blechnifolia
Banksia	brownii
Banksia	burdettii
Banksia	caleyi
Banksia	candolleana
Banksia	canei
Banksia	chamaephyton
Banksia	coccinea
Banksia	conferta
Banksia	croajingolensis
Banksia	cuneata
Banksia	dentata
Banksia	dryandroides
Banksia	elderiana
Banksia	elegans
Banksia	epica
Banksia	ericifolia
Banksia	ericifolia var. macrantha
Banksia	gardneri
Banksia	goodii
Banksia	grandis
Banksia	grossa
Banksia	hookeriana
Banksia	ilicifolia
Banksia	incana
Banksia	integrifolia
Banksia	laevigata
Banksia	lanata
Banksia	laricina
Banksia	leptophylla
Banksia	lindleyana
Banksia	littoralis
Banksia	lullfitzii
Banksia	marginata
Banksia	media
Banksia	meisneri
Banksia	menziesii
Banksia	micrantha
Banksia	nutans
Banksia	oblongifolia
Banksia	occidentalis
Banksia	oligantha
Banksia	oreophila
Banksia	ornata
Banksia	paludosa
Banksia	petiolaris
Banksia	pilostylis
Banksia	plagiocarpa
Banksia	praemorsa
Banksia	prionotes
Banksia	pulchella
Banksia	quercifolia
Banksia	repens
Banksia	robur
Banksia	rosserae
Banksia	saxicola
Banksia	scabrella
Banksia	sceptrum
Banksia	seminuda
Banksia	serrata
Banksia	solandri
Banksia	speciosa
Banksia	sphaerocarpa
Banksia	spinulosa
Banksia	spinulosa var. cunninghamii
Banksia	spinulosa var. collina
Banksia	telmatiaea
Banksia	tricuspis
Banksia	verticillata
Banksia	victoriae
Banksia	violacea
Banksia	acanthopoda
Banksia	anatona
Banksia	arborea
Banksia	arctotidis
Banksia	armata
Banksia	aurantia
Banksia	biterax
Banksia	bipinnatifida
Banksia	pellaeifolia
Banksia	borealis
Banksia	brunnea
Banksia	calophylla
Banksia	carlinoides
Banksia	catoglypta
Banksia	cirsioides
Banksia	columnaris
Banksia	comosa
Banksia	concinna
Banksia	densa
Banksia	corvijuga
Banksia	obovata
Banksia	cynaroides
Banksia	cypholoba
Banksia	drummondii
Banksia	echinata
Banksia	epimicta
Banksia	erythrocephala
Banksia	falcata
Banksia	fasciculata
Banksia	rufa
Banksia	fililoba
Banksia	foliolata
Banksia	foliosissima
Banksia	formosa
Banksia	fraseri
Banksia	fuscobractea
Banksia	glaucifolia
Banksia	hewardiana
Banksia	hirta
Banksia	horrida
Banksia	idiogenes
Banksia	insulanemorecincta
Banksia	ionthocarpa
Banksia	kippistiana
Banksia	lepidorhiza
Banksia	dallanneyi
Banksia	meganotia
Banksia	mimica
Banksia	montana
Banksia	mucronulata
Banksia	nana
Banksia	alliacea
Banksia	nobilis
Banksia	obtusa
Banksia	octotriginta
Banksia	pallida
Banksia	platycarpa
Banksia	plumosa
Banksia	polycephala
Banksia	porrecta
Banksia	undata
Banksia	acuminata
Banksia	prionophylla
Banksia	proteoides
Banksia	pseudoplumosa
Banksia	pteridifolia
Banksia	bella
Banksia	purdieana
Banksia	heliantha
Banksia	rufistylis
Banksia	sclerophylla
Banksia	seneciifolia
Banksia	serra
Banksia	serratuloides
Banksia	sessilis
Banksia	shanklandiorum
Banksia	shuttleworthiana
Banksia	splendida
Banksia	squarrosa
Banksia	stenoprion
Banksia	strictifolia
Banksia	stuposa
Banksia	subpinnatifida
Banksia	subulata
Banksia	tenuis
Banksia	tortifolia
Banksia	tridentata
Banksia	trifontinalis
Banksia	vestita
Banksia	viscida
Banksia	wonganensis
Banksia	xylothemelia
Beauprea	asplenioides
Beauprea	balansae
Beauprea	comptonii
Beauprea	congesta
Beauprea	crassifolia
Beauprea	filipes
Beauprea	gracilis
Beauprea	montana
Beauprea	montis-fontium
Beauprea	neglecta
Beauprea	pancheri
Beauprea	penariensis
Beauprea	spathulifolia
Beaupreopsis	paniculata
Bellendena	montana
Bleasdalea	bleasdalei
Bleasdalea	papuana
Brabejum	stellatifolium
Buckinghamia	celsissima
Buckinghamia	ferruginiflora
Cardwellia	sublimis
Carnarvonia	araliifolia
Catalepidia	heyana
Cenarrhenes	nitida
Conospermum	acerosum
Conospermum	amoenum
Conospermum	boreale
Conospermum	brachyphyllum
Conospermum	bracteosum
Conospermum	brownii
Conospermum	burgessiorum
Conospermum	caeruleum
Conospermum	canaliculatum
Conospermum	capitatum
Conospermum	cinereum
Conospermum	coerulescens
Conospermum	crassinervium
Conospermum	croniniae
Conospermum	densiflorum
Conospermum	distichum
Conospermum	eatoniae
Conospermum	ellipticum
Conospermum	ephedroides
Conospermum	ericifolium
Conospermum	filifolium
Conospermum	flexuosum
Conospermum	floribundum
Conospermum	galeatum
Conospermum	glumaceum
Conospermum	hookeri
Conospermum	huegelii
Conospermum	incurvum
Conospermum	leianthum
Conospermum	longifolium
Conospermum	microflorum
Conospermum	mitchellii
Conospermum	multispicatum
Conospermum	nervosum
Conospermum	paniculatum
Conospermum	patens
Conospermum	petiolare
Conospermum	polycephalum
Conospermum	quadripetalum
Conospermum	scaposum
Conospermum	sigmoideum
Conospermum	spectabile
Conospermum	sphacelatum
Conospermum	stoechadis
Conospermum	taxifolium
Conospermum	tenuifolium
Conospermum	teretifolium
Conospermum	toddii
Conospermum	triplinervium
Conospermum	undulatum
Conospermum	unilaterale
Conospermum	wycherleyi
Darlingia	darlingiana
Darlingia	ferruginea
Diastella	buekii
Diastella	divaricata
Diastella	fraterna
Diastella	myrtifolia
Diastella	parilis
Diastella	proteoides
Diastella	thymelaeoides
Dilobeia	tenuinervis
Dilobeia	thouarsii
Eidothea	hardeniana
Eidothea	zoexylocarya
Embothrium	coccineum
Eucarpha	deplanchei
Euplassa	bahiensis
Euplassa	cantareirae
Euplassa	chimantensis
Euplassa	duquei
Euplassa	glaziovii
Euplassa	hoehnei
Euplassa	inaequalis
Euplassa	incana
Euplassa	isernii
Euplassa	itatiaiae
Euplassa	legalis
Euplassa	madeirae
Euplassa	nebularis
Euplassa	occidentalis
Euplassa	organensis
Euplassa	pinnata
Euplassa	rufa
Euplassa	saxicola
Euplassa	semicostata
Euplassa	taubertiana
Faurea	arborea
Faurea	argentea
Faurea	coriacea
Faurea	delevoyi
Faurea	discolor
Faurea	forficuliflora
Faurea	galpinii
Faurea	intermedia
Faurea	lucida
Faurea	macnaughtonii
Faurea	racemosa
Faurea	rochetiana
Faurea	rubriflora
Faurea	saligna
Faurea	wentzeliana
Finschia	carrii
Finschia	chloroxantha
Finschia	ferruginiflora
Finschia	rufa
Floydia	praealta
Franklandia	fucifolia
Franklandia	triaristata
Garnieria	spathulifolia
Gevuina	avellana
Grevillea	acacioides
Grevillea	acanthifolia
Grevillea	acerata
Grevillea	acrobotrya
Grevillea	acropogon
Grevillea	acuaria
Grevillea	adenotricha
Grevillea	agrifolia
Grevillea	albiflora
Grevillea	alpina
Grevillea	alpivaga
Grevillea	althoferorum
Grevillea	amplexans
Grevillea	anethifolia
Grevillea	aneura
Grevillea	angulata
Grevillea	angustiloba
Grevillea	annulifera
Grevillea	aquifolium
Grevillea	arenaria
Grevillea	arenaria subsp. canescens
Grevillea	argyrophylla
Grevillea	armigera
Grevillea	asparagoides
Grevillea	aspera
Grevillea	aspleniifolia
Grevillea	asteriscosa
Grevillea	aurea
Grevillea	australis
Grevillea	baileyana
Grevillea	banksii
Grevillea	banyabba
Grevillea	barklyana
Grevillea	batrachioides
Grevillea	baueri
Grevillea	baxteri
Grevillea	beadleana
Grevillea	beardiana
Grevillea	bedggoodiana
Grevillea	bemboka
Grevillea	benthamiana
Grevillea	berryana
Grevillea	biformis
Grevillea	bipinnatifida
Grevillea	biternata
Grevillea	brachystachya
Grevillea	brachystylis
Grevillea	bracteosa
Grevillea	brevifolia
Grevillea	brevis
Grevillea	bronweniae
Grevillea	buxifolia
Grevillea	byrnesii
Grevillea	cagiana
Grevillea	calcicola
Grevillea	caleyi
Grevillea	calliantha
Grevillea	callichlaena
Grevillea	candelabroides
Grevillea	candicans
Grevillea	candolleana
Grevillea	capitellata
Grevillea	celata
Grevillea	centristigma
Grevillea	ceratocarpa
Grevillea	cheilocarpa
Grevillea	christineae
Grevillea	chrysophaea
Grevillea	cirsiifolia
Grevillea	coccinea
Grevillea	commutata
Grevillea	concinna
Grevillea	confertifolia
Grevillea	coriacea
Grevillea	corrugata
Grevillea	costata
Grevillea	crassifolia
Grevillea	cravenii
Grevillea	crithmifolia
Grevillea	crowleyae
Grevillea	cunninghamii
Grevillea	curviloba
Grevillea	cyranostigma
Grevillea	decipiens
Grevillea	decurrens
Grevillea	deflexa
Grevillea	delta
Grevillea	depauperata
Grevillea	didymobotrya
Grevillea	dielsiana
Grevillea	diffusa
Grevillea	dimidiata
Grevillea	diminuta
Grevillea	dimorpha
Grevillea	disjuncta
Grevillea	dissecta
Grevillea	divaricata
Grevillea	diversifolia
Grevillea	dolichopoda
Grevillea	donaldiana
Grevillea	drummondii
Grevillea	dryandri
Grevillea	dryandroides
Grevillea	dryophylla
Grevillea	dunlopii
Grevillea	elbertii
Grevillea	elongata
Grevillea	endlicheriana
Grevillea	epicroca
Grevillea	erectiloba
Grevillea	eremophila
Grevillea	erinacea
Grevillea	eriobotrya
Grevillea	eriostachya
Grevillea	eryngioides
Grevillea	erythroclada
Grevillea	evanescens
Grevillea	evansiana
Grevillea	excelsior
Grevillea	exposita
Grevillea	extorris
Grevillea	exul
Grevillea	fasciculata
Grevillea	fastigiata
Grevillea	fililoba
Grevillea	fistulosa
Grevillea	flexuosa
Grevillea	floribunda
Grevillea	florida
Grevillea	floripendula
Grevillea	formosa
Grevillea	fulgens
Grevillea	fuscolutea
Grevillea	gariwerdensis
Grevillea	georgeana
Grevillea	gillivrayi
Grevillea	glabrescens
Grevillea	glauca
Grevillea	globosa
Grevillea	glossadenia
Grevillea	goodii
Grevillea	gordoniana
Grevillea	granulifera
Grevillea	granulosa
Grevillea	guthrieana
Grevillea	hakeoides
Grevillea	halmaturina
Grevillea	haplantha
Grevillea	heliosperma
Grevillea	helmsiae
Grevillea	hilliana
Grevillea	hirtella
Grevillea	hislopii
Grevillea	hockingsii
Grevillea	hodgei
Grevillea	hookeriana
Grevillea	huegelii
Grevillea	humifusa
Grevillea	humilis
Grevillea	iaspicula
Grevillea	ilicifolia
Grevillea	imberbis
Grevillea	inconspicua
Grevillea	incrassata
Grevillea	incurva
Grevillea	infecunda
Grevillea	infundibularis
Grevillea	insignis
Grevillea	integrifolia
Grevillea	intricata
Grevillea	involucrata
Grevillea	irrasa
Grevillea	jephcottii
Grevillea	johnsonii
Grevillea	juncifolia
Grevillea	juniperina
Grevillea	juniperina subsp. amphitricha
Grevillea	juniperina subsp. sulphurea
Grevillea	kedumbensis
Grevillea	kenneallyi
Grevillea	kennedyana
Grevillea	kirkalocka
Grevillea	lanigera
Grevillea	latifolia
Grevillea	laurifolia
Grevillea	lavandulacea
Grevillea	leiophylla
Grevillea	leptobotrys
Grevillea	leptopoda
Grevillea	leucoclada
Grevillea	leucopteris
Grevillea	levis
Grevillea	linearifolia
Grevillea	linsmithii
Grevillea	lissopleura
Grevillea	longicuspis
Grevillea	longifolia
Grevillea	longistyla
Grevillea	lullfitzii
Grevillea	maccutcheonii
Grevillea	macleayana
Grevillea	maherae
Grevillea	makinsonii
Grevillea	manglesii
Grevillea	manglesii subsp. ornithopoda
Grevillea	manglesioides
Grevillea	marriottii
Grevillea	masonii
Grevillea	maxwellii
Grevillea	meisneri
Grevillea	metamorpha
Grevillea	micrantha
Grevillea	microstegia
Grevillea	microstyla
Grevillea	mimosoides
Grevillea	miniata
Grevillea	minutiflora
Grevillea	miqueliana
Grevillea	mollis
Grevillea	molyneuxii
Grevillea	monslacana
Grevillea	montana
Grevillea	monticola
Grevillea	montis-cole
Grevillea	mucronulata
Grevillea	muelleri
Grevillea	murex
Grevillea	muricata
Grevillea	myosodes
Grevillea	nana
Grevillea	nematophylla
Grevillea	neurophylla
Grevillea	newbeyi
Grevillea	nudiflora
Grevillea	obliquistigma
Grevillea	obtecta
Grevillea	obtusiflora
Grevillea	obtusifolia
Grevillea	occidentalis
Grevillea	oldei
Grevillea	oleoides
Grevillea	oligantha
Grevillea	oligomera
Grevillea	olivacea
Grevillea	oncogyne
Grevillea	oxyantha
Grevillea	pachylostyla
Grevillea	paniculata
Grevillea	papillosa
Grevillea	papuana
Grevillea	paradoxa
Grevillea	parallela
Grevillea	parallelinervis
Grevillea	parviflora
Grevillea	parvula
Grevillea	patentiloba
Grevillea	patulifolia
Grevillea	pauciflora
Grevillea	pectinata
Grevillea	petrophiloides
Grevillea	phanerophlebia
Grevillea	phillipsiana
Grevillea	pilosa
Grevillea	pilulifera
Grevillea	pimeleoides
Grevillea	pinaster
Grevillea	pinifolia
Grevillea	pityophylla
Grevillea	pluricaulis
Grevillea	plurijuga
Grevillea	polyacida
Grevillea	polybotrya
Grevillea	polybractea
Grevillea	prasina
Grevillea	preissii
Grevillea	prominens
Grevillea	prostrata
Grevillea	psilantha
Grevillea	pteridifolia
Grevillea	pterosperma
Grevillea	pulchella
Grevillea	punctata
Grevillea	pungens
Grevillea	pyramidalis
Grevillea	pythara
Grevillea	quadricauda
Grevillea	quercifolia
Grevillea	quinquenervis
Grevillea	ramosissima
Grevillea	rara
Grevillea	raybrownii
Grevillea	refracta
Grevillea	renwickiana
Grevillea	repens
Grevillea	reptans
Grevillea	rhizomatosa
Grevillea	rhyolitica
Grevillea	rigida
Grevillea	ripicola
Grevillea	rivularis
Grevillea	robusta
Grevillea	rogersoniana
Grevillea	rosieri
Grevillea	rosmarinifolia
Grevillea	rosmarinifolia subsp. glabella
Grevillea	roycei
Grevillea	rubicunda
Grevillea	rudis
Grevillea	saccata
Grevillea	sarissa
Grevillea	scabra
Grevillea	scabrida
Grevillea	scapigera
Grevillea	scortechinii
Grevillea	secunda
Grevillea	sericea
Grevillea	sessilis
Grevillea	shiressii
Grevillea	shuttleworthiana
Grevillea	singuliflora
Grevillea	sparsiflora
Grevillea	speciosa
Grevillea	sphacelata
Grevillea	spinosa
Grevillea	spinosissima
Grevillea	squiresiae
Grevillea	steiglitziana
Grevillea	stenobotrya
Grevillea	stenogyne
Grevillea	stenomera
Grevillea	stenostachya
Grevillea	striata
Grevillea	subterlineata
Grevillea	subtiliflora
Grevillea	sulcata
Grevillea	synapheae
Grevillea	tenuiflora
Grevillea	tenuiloba
Grevillea	teretifolia
Grevillea	tetragonoloba
Grevillea	tetrapleura
Grevillea	thelemanniana
Grevillea	thyrsoides
Grevillea	trachytheca
Grevillea	tridentifera
Grevillea	treueriana
Grevillea	trifida
Grevillea	triloba
Grevillea	tripartita
Grevillea	triternata
Grevillea	umbellulata
Grevillea	uncinulata
Grevillea	uniformis
Grevillea	variifolia
Grevillea	velutinella
Grevillea	venusta
Grevillea	versicolor
Grevillea	vestita
Grevillea	victoriae
Grevillea	virgata
Grevillea	viridiflava
Grevillea	whiteana
Grevillea	wickhamii
Grevillea	wilkinsonii
Grevillea	willisii
Grevillea	wilsonii
Grevillea	wiradjuri
Grevillea	wittweri
Grevillea	xiphoidea
Grevillea	yorkrakinensis
Grevillea	zygoloba
Hakea	actites
Hakea	aculeata
Hakea	acuminata
Hakea	adnata
Hakea	aenigma
Hakea	ambigua
Hakea	amplexicaulis
Hakea	anadenia
Hakea	arborescens
Hakea	archaeoides
Hakea	asperma
Hakea	auriculata
Hakea	bakeriana
Hakea	baxteri
Hakea	bicornata
Hakea	brachyptera
Hakea	brownii
Hakea	bucculenta
Hakea	candolleana
Hakea	carinata
Hakea	ceratophylla
Hakea	chordophylla
Hakea	chromatropa
Hakea	cinerea
Hakea	circumalata
Hakea	clavata
Hakea	collina
Hakea	commutata
Hakea	conchifolia
Hakea	constablei
Hakea	corymbosa
Hakea	costata
Hakea	cristata
Hakea	cucullata
Hakea	cyclocarpa
Hakea	cycloptera
Hakea	cygna
Hakea	dactyloides
Hakea	denticulata
Hakea	decurrens
Hakea	divaricata
Hakea	dohertyi
Hakea	drupacea
Hakea	elliptica
Hakea	ednieana
Hakea	eneabba
Hakea	epiglottis
Hakea	erecta
Hakea	eriantha
Hakea	erinacea
Hakea	eyreana
Hakea	falcata
Hakea	ferruginea
Hakea	flabellifolia
Hakea	florida
Hakea	florulenta
Hakea	francisiana
Hakea	fraseri
Hakea	gibbosa
Hakea	gilbertii
Hakea	grammatophylla
Hakea	hastata
Hakea	hookeriana
Hakea	horrida
Hakea	ilicifolia
Hakea	incrassata
Hakea	invaginata
Hakea	ivoryi
Hakea	kippistiana
Hakea	laevipes
Hakea	lasiantha
Hakea	lasianthoides
Hakea	lasiocarpha
Hakea	laurina
Hakea	lehmanniana
Hakea	leucoptera
Hakea	linearis
Hakea	lissocarpha
Hakea	lissosperma
Hakea	longiflora
Hakea	loranthifolia
Hakea	lorea
Hakea	maconochieana
Hakea	macraeana
Hakea	macrocarpa
Hakea	macrorhyncha
Hakea	marginata
Hakea	megadenia
Hakea	megalosperma
Hakea	meisneriana
Hakea	microcarpa
Hakea	minyma
Hakea	mitchellii
Hakea	multilineata
Hakea	myrtoides
Hakea	neurophylla
Hakea	newbeyana
Hakea	nitida
Hakea	nodosa
Hakea	obliqua
Hakea	obtusa
Hakea	ochroptera
Hakea	oleifolia
Hakea	orthorrhyncha
Hakea	pachyphylla
Hakea	pandanicarpa
Hakea	pandanicarpa subsp. crassifolia
Hakea	pedunculata
Hakea	pendens
Hakea	persiehana
Hakea	petiolaris
Hakea	platysperma
Hakea	plurinervia
Hakea	polyanthema
Hakea	preissii
Hakea	pritzelii
Hakea	propinqua
Hakea	prostrata
Hakea	psilorrhyncha
Hakea	pulvinifera
Hakea	purpurea
Hakea	pycnoneura
Hakea	recurva
Hakea	repullulans
Hakea	rhombales
Hakea	rigida
Hakea	rostrata
Hakea	rugosa
Hakea	ruscifolia
Hakea	salicifolia
Hakea	scoparia
Hakea	sericea
Hakea	smilacifolia
Hakea	spathulata
Hakea	standleyensis
Hakea	stenocarpa
Hakea	stenophylla
Hakea	strumosa
Hakea	subsulcata
Hakea	sulcata
Hakea	teretifolia
Hakea	tephrosperma
Hakea	trifurcata
Hakea	trineura
Hakea	tuberculata
Hakea	undulata
Hakea	ulicina
Hakea	varia
Hakea	verrucosa
Hakea	victoriae
Hakea	vittata
Helicia	acutifolia
Helicia	albiflora
Helicia	amplifolia
Helicia	attenuata
Helicia	australasica
Helicia	calocoma
Helicia	cauliflora
Helicia	clivicola
Helicia	cochinchinensis
Helicia	dongxingensis
Helicia	excelsa
Helicia	formosana
Helicia	fuscotomentosa
Helicia	glabriflora
Helicia	grandis
Helicia	grandifolia
Helicia	hainanensis
Helicia	insularis
Helicia	kwangtungensis
Helicia	latifolia
Helicia	longipetiolata
Helicia	maxwelliana
Helicia	moluccana
Helicia	neglecta
Helicia	nilagirica
Helicia	obovatifolia
Helicia	peekelii
Helicia	peltata
Helicia	petiolaris
Helicia	polyosmoides
Helicia	pterygota
Helicia	pyrrhobotrya
Helicia	rengetiensis
Helicia	reticulata
Helicia	retusa
Helicia	robusta
Helicia	rostrata
Helicia	shweliensis
Helicia	silvicola
Helicia	tibetensis
Helicia	tsaii
Helicia	vestita
Heliciopsis	artocarpoides
Heliciopsis	cockburnii
Heliciopsis	henryi
Heliciopsis	incisa
Heliciopsis	lanceolata
Heliciopsis	litseifolia
Heliciopsis	lobata
Heliciopsis	mahmudii
Heliciopsis	montana
Heliciopsis	percoriacea
Heliciopsis	rufidula
Heliciopsis	terminalis
Heliciopsis	velutina
Heliciopsis	whitmorei
Hicksbeachia	pilosa
Hicksbeachia	pinnatifolia
Hollandaea	sayeriana
Hollandaea	riparia
Isopogon	adenanthoides
Isopogon	alcicornis
Isopogon	anethifolius
Isopogon	anemonifolius
Isopogon	asper
Isopogon	attenuatus
Isopogon	axillaris
Isopogon	baxteri
Isopogon	buxifolius
Isopogon	ceratophyllus
Isopogon	cuneatus
Isopogon	dawsonii
Isopogon	divergens
Isopogon	drummondii
Isopogon	dubius
Isopogon	fletcheri
Isopogon	formosus
Isopogon	inconspicuus
Isopogon	latifolius
Isopogon	linearis
Isopogon	longifolius
Isopogon	petiolaris
Isopogon	polycephalus
Isopogon	prostratus
Isopogon	scabriusculus
Isopogon	sphaerocephalus
Isopogon	teretifolius
Isopogon	tridens
Isopogon	trilobus
Isopogon	uncinatus
Isopogon	villosus
Kermadecia	elliptica
Kermadecia	pronyensis
Kermadecia	rotundifolia
Kermadecia	sinuata
Knightia	excelsa
Lambertia	echinata
Lambertia	ericifolia
Lambertia	fairallii
Lambertia	formosa
Lambertia	ilicifolia
Lambertia	inermis
Lambertia	multiflora
Lambertia	orbifolia
Lambertia	rariflora
Lambertia	uniflora
Leucadendron	album
Leucadendron	arcuatum
Leucadendron	argenteum
Leucadendron	barkerae
Leucadendron	bonum
Leucadendron	brunioides
Leucadendron	burchellii
Leucadendron	cadens
Leucadendron	chamelaea
Leucadendron	cinereum
Leucadendron	comosum
Leucadendron	concavum
Leucadendron	conicum
Leucadendron	coniferum
Leucadendron	cordatum
Leucadendron	coriaceum
Leucadendron	corymbosum
Leucadendron	cryptocephalum
Leucadendron	daphnoides
Leucadendron	diemontianum
Leucadendron	discolor
Leucadendron	dregei
Leucadendron	dubium
Leucadendron	elimense
Leucadendron	ericifolium
Leucadendron	eucalyptifolium
Leucadendron	flexuosum
Leucadendron	floridum
Leucadendron	foedum
Leucadendron	galpinii
Leucadendron	gandogeri
Leucadendron	glaberrimum
Leucadendron	globosum
Leucadendron	grandiflorum
Leucadendron	gydoense
Leucadendron	immoderatum
Leucadendron	lanigerum
Leucadendron	laureolum
Leucadendron	laxum
Leucadendron	levisanus
Leucadendron	linifolium
Leucadendron	loeriense
Leucadendron	loranthifolium
Leucadendron	macowanii
Leucadendron	meridianum
Leucadendron	meyerianum
Leucadendron	microcephalum
Leucadendron	modestum
Leucadendron	muirii
Leucadendron	nervosum
Leucadendron	nitidum
Leucadendron	nobile
Leucadendron	olens
Leucadendron	orientale
Leucadendron	osbornei
Leucadendron	platyspermum
Leucadendron	pondoense
Leucadendron	procerum
Leucadendron	pubescens
Leucadendron	pubibracteolatum
Leucadendron	radiatum
Leucadendron	remotum
Leucadendron	roodii
Leucadendron	rourkei
Leucadendron	rubrum
Leucadendron	salicifolium
Leucadendron	salignum
Leucadendron	sericeum
Leucadendron	sessile
Leucadendron	sheilae
Leucadendron	singulare
Leucadendron	sorocephalodes
Leucadendron	spirale
Leucadendron	spissifolium
Leucadendron	stellare
Leucadendron	stelligerum
Leucadendron	strobilinum
Leucadendron	teretifolium
Leucadendron	thymifolium
Leucadendron	tinctum
Leucadendron	tradouwense
Leucadendron	uliginosum
Leucadendron	verticillatum
Leucadendron	xanthoconus
Leucospermum	arenarium
Leucospermum	bolusii
Leucospermum	calligerum
Leucospermum	catherinae
Leucospermum	conocarpodendron
Leucospermum	cordatum
Leucospermum	cordifolium
Leucospermum	cuneiforme
Leucospermum	erubescens
Leucospermum	formosum
Leucospermum	fulgens
Leucospermum	gerrardii
Leucospermum	glabrum
Leucospermum	gracile
Leucospermum	grandiflorum
Leucospermum	gueinzii
Leucospermum	hamatum
Leucospermum	harpagonatum
Leucospermum	heterophyllum
Leucospermum	hypophyllocarpodendron
Leucospermum	innovans
Leucospermum	lineare
Leucospermum	muirii
Leucospermum	mundii
Leucospermum	oleifolium
Leucospermum	parile
Leucospermum	patersonii
Leucospermum	pedunculatum
Leucospermum	pluridens
Leucospermum	praecox
Leucospermum	praemorsum
Leucospermum	profugum
Leucospermum	prostratum
Leucospermum	reflexum
Leucospermum	rodolentum
Leucospermum	royenifolium
Leucospermum	saxatile
Leucospermum	saxosum
Leucospermum	secundifolium
Leucospermum	spathulatum
Leucospermum	tomentosum
Leucospermum	tottum
Leucospermum	truncatulum
Leucospermum	truncatum
Leucospermum	utriculosum
Leucospermum	vestitum
Leucospermum	winteri
Leucospermum	wittebergensis
Lomatia	arborescens
Lomatia	dentata
Lomatia	ferruginea
Lomatia	fraseri
Lomatia	fraxinifolia
Lomatia	hirsuta
Lomatia	ilicifolia
Lomatia	myricoides
Lomatia	polymorpha
Lomatia	silaifolia
Lomatia	tasmanica
Lomatia	tinctoria
Macadamia	claudiensis
Macadamia	grandis
Macadamia	hildebrandii
Macadamia	integrifolia
Macadamia	jansenii
Macadamia	ternifolia
Macadamia	tetraphylla
Macadamia	whelanii
Macadamia	neurophylla
Malagasia	alticola
Megahertzia	amplexicaulis
Mimetes	arboreus
Mimetes	argenteus
Mimetes	capitulatus
Mimetes	chrysanthus
Mimetes	cucullatus
Mimetes	fimbrifolius
Mimetes	hirtus
Mimetes	hottentoticus
Mimetes	palustris
Mimetes	pauciflorus
Mimetes	saxatilis
Mimetes	splendidus
Mimetes	stokoei
Musgravea	stenostachya
Musgravea	heterophylla
Neorites	kevediana
Opisthiolepis	heterophylla
Oreocallis	grandiflora
Orites	acicularis
Orites	diversifolius
Orites	excelsus
Orites	fiebrigii
Orites	lancifolius
Orites	milliganii
Orites	myrtoidea
Orites	revolutus
Orothamnus	zeyheri
Panopsis	cinnamomea
Panopsis	mucronata
Panopsis	multiflora
Panopsis	parimensis
Panopsis	pearcei
Panopsis	polystachya
Panopsis	ptariana
Panopsis	rubescens
Panopsis	sessilifolia
Panopsis	suaveolens
Panopsis	tepuiana
Panopsis	yolombo
Paranomus	abrotanifolius
Paranomus	adiantifolius
Paranomus	bolusii
Paranomus	bracteolaris
Paranomus	candicans
Paranomus	capitatus
Paranomus	centaureoides
Paranomus	dispersus
Paranomus	dregei
Paranomus	esterhuyseniae
Paranomus	lagopus
Paranomus	longicaulis
Paranomus	reflexus
Paranomus	roodebergensis
Paranomus	sceptrum-gustavianus
Paranomus	spathulatus
Paranomus	spicatus
Paranomus	tomentosus
Persoonia	inconspicua
Persoonia	brevirhachis
Persoonia	rufiflora
Persoonia	laurina
Persoonia	confertiflora
Persoonia	silvatica
Persoonia	longifolia
Persoonia	elliptica
Persoonia	arborea
Persoonia	subvelutina
Persoonia	gunnii
Persoonia	muelleri
Persoonia	moscalii
Persoonia	juniperina
Persoonia	chamaepeuce
Persoonia	virgata
Persoonia	tenuifolia
Persoonia	acerosa
Persoonia	myrtilloides
Persoonia	brevifolia
Persoonia	acuminata
Persoonia	recedens
Persoonia	oxycoccoides
Persoonia	asperula
Persoonia	microphylla
Persoonia	terminalis
Persoonia	bargoensis
Persoonia	nutans
Persoonia	laxa
Persoonia	oblongata
Persoonia	marginata
Persoonia	daphnoides
Persoonia	procumbens
Persoonia	oleoides
Persoonia	rufa
Persoonia	cornifolia
Persoonia	katerae
Persoonia	adenantha
Persoonia	stradbrokensis
Persoonia	prostrata
Persoonia	conjuncta
Persoonia	media
Persoonia	iogyna
Persoonia	tropica
Persoonia	amaliae
Persoonia	volcanica
Persoonia	hirsuta
Persoonia	chamaepitys
Persoonia	sericea
Persoonia	fastigiata
Persoonia	subtilis
Persoonia	curvifolia
Persoonia	cuspidifera
Persoonia	rigida
Persoonia	mollis
Persoonia	lanceolata
Persoonia	glaucescens
Persoonia	levis
Persoonia	linearis
Persoonia	pinifolia
Persoonia	isophylla
Persoonia	coriacea
Persoonia	helix
Persoonia	pertinax
Persoonia	cymbifolia
Persoonia	leucopogon
Persoonia	pungens
Persoonia	baeckeoides
Persoonia	cordifolia
Persoonia	dillwynioides
Persoonia	flexifolia
Persoonia	graminea
Persoonia	micranthera
Persoonia	chapmaniana
Persoonia	pentasticha
Persoonia	trinervis
Persoonia	angustiflora
Persoonia	papillosa
Persoonia	bowgada
Persoonia	hexagona
Persoonia	spathulata
Persoonia	scabra
Persoonia	quinquenervis
Persoonia	striata
Persoonia	sulcata
Persoonia	acicularis
Persoonia	rudis
Persoonia	filiformis
Persoonia	falcata
Persoonia	biglandulosa
Persoonia	brachystylis
Persoonia	kararae
Persoonia	stricta
Persoonia	saundersiana
Persoonia	teretifolia
Persoonia	comata
Persoonia	saccata
Persoonia	hakeiformis
Petrophile	acicularis
Petrophile	aculeata
Petrophile	anceps
Petrophile	antecedens
Petrophile	arcuata
Petrophile	aspera
Petrophile	axillaris
Petrophile	biloba
Petrophile	biternata
Petrophile	brevifolia
Petrophile	canescens
Petrophile	carduacea
Petrophile	chrysantha
Petrophile	circinata
Petrophile	clavata
Petrophile	conifera
Petrophile	crispata
Petrophile	cyathiforma
Petrophile	divaricata
Petrophile	diversifolia
Petrophile	drummondii
Petrophile	ericifolia
Petrophile	fastigiata
Petrophile	filifolia
Petrophile	glauca
Petrophile	helicophylla
Petrophile	heterophylla
Petrophile	imbricata
Petrophile	incurvata
Petrophile	juncifolia
Petrophile	latericola
Petrophile	linearis
Petrophile	longifolia
Petrophile	macrostachya
Petrophile	media
Petrophile	megalostegia
Petrophile	merrallii
Petrophile	misturata
Petrophile	multisecta
Petrophile	nivea
Petrophile	pauciflora
Petrophile	pedunculata
Petrophile	phylicoides
Petrophile	pilostyla
Petrophile	plumosa
Petrophile	prostrata
Petrophile	pulchella
Petrophile	recurva
Petrophile	rigida
Petrophile	scabriuscula
Petrophile	semifurcata
Petrophile	seminuda
Petrophile	serruriae
Petrophile	sessilis
Petrophile	shirleyae
Petrophile	shuttleworthiana
Petrophile	squamata
Petrophile	striata
Petrophile	stricta
Petrophile	teretifolia
Petrophile	trifurcata
Petrophile	wonganensis
Placospermum	coriaceum
Protea	caffra
Protea	dracomontana
Protea	glabra
Protea	inopina
Protea	nitida
Protea	nubigena
Protea	parvula
Protea	petiolaris
Protea	rupicola
Protea	simplex
Protea	decurrens
Protea	enervis
Protea	angolensis
Protea	comptonii
Protea	curvata
Protea	laetans
Protea	madiensis
Protea	rubropilosa
Protea	rupestris
Protea	welwitschii
Protea	asymmetrica
Protea	wentzeliana
Protea	cynaroides
Protea	cryophila
Protea	pruinosa
Protea	scabriuscula
Protea	scolopendriifolia
Protea	burchellii
Protea	compacta
Protea	cordata
Protea	eximia
Protea	longifolia
Protea	obtusifolia
Protea	pudens
Protea	roupelliae
Protea	susannae
Protea	aristata
Protea	lanceolata
Protea	repens
Protea	coronata
Protea	grandiceps
Protea	holosericea
Protea	laurifolia
Protea	lepidocarpodendron
Protea	lorifolia
Protea	magnifica
Protea	neriifolia
Protea	speciosa
Protea	stokoei
Protea	aurea
Protea	aurea subsp. potbergensis
Protea	lacticolor
Protea	mundii
Protea	punctata
Protea	subvestita
Protea	aristata
Protea	venusta
Protea	acaulos
Protea	convexa
Protea	laevis
Protea	revoluta
Protea	ungustata
Protea	foliosa
Protea	intonsa
Protea	montana
Protea	tenax
Protea	vogtsiae
Protea	acuminata
Protea	canaliculata
Protea	nana
Protea	pityphylla
Protea	scolymocephala
Protea	witzenbergiana
Protea	amplexicaulis
Protea	namaquana
Protea	pendula
Protea	recondita
Protea	sulphurea
Protea	caespitosa
Protea	aspera
Protea	denticulata
Protea	effusa
Protea	eximia
Protea	gaguedi
Protea	lorea
Protea	piscina
Protea	restionifolia
Protea	scabra
Protea	scorzonerifolia
Roupala	asplenioides
Roupala	barnettiae
Roupala	brachybotrys
Roupala	brachybotrys subsp. grossidentata
Roupala	consimilis
Roupala	cordifolia
Roupala	dielsii
Roupala	ferruginea
Roupala	glaberrima
Roupala	jelskii
Roupala	lucens
Roupala	longepetiolata
Roupala	macrophylla
Roupala	meisneri
Roupala	minima
Roupala	monosperma
Roupala	montana
Roupala	montana var. paraensis
Roupala	nitida
Roupala	obtusata
Roupala	pachypoda
Roupala	pallida
Roupala	percoriacea
Roupala	pseudocordata
Roupala	sculpta
Roupala	sororopana
Roupala	sphenophyllum
Roupala	spicata
Roupala	suaveolens
Serruria	acrocarpa
Serruria	adscendens
Serruria	aemula
Serruria	aitonii
Serruria	altiscapa
Serruria	balanocephala
Serruria	bolusii
Serruria	brownii
Serruria	candicans
Serruria	collina
Serruria	confragosa
Serruria	cyanoides
Serruria	cygnea
Serruria	decipiens
Serruria	decumbens
Serruria	deluvialis
Serruria	dodii
Serruria	effusa
Serruria	elongata
Serruria	fasciflora
Serruria	flagellifolia
Serruria	flava
Serruria	florida
Serruria	fucifolia
Serruria	furcellata
Serruria	glomerata
Serruria	gremialis
Serruria	heterophylla
Serruria	hirsuta
Serruria	inconspicua
Serruria	incrassata
Serruria	kraussii
Serruria	lacunosa
Serruria	leipoldtii
Serruria	linearis
Serruria	meisneriana
Serruria	millefolia
Serruria	nervosa
Serruria	nivenii
Serruria	pedunculata
Serruria	phylicoides
Serruria	pinnata
Serruria	rebeloi
Serruria	reflexa
Serruria	rosea
Serruria	roxburghii
Serruria	rubricaulis
Serruria	scoparia
Serruria	stellata
Serruria	trilopha
Serruria	triternata
Serruria	villosa
Serruria	viridifolia
Serruria	williamsii
Serruria	zeyheri
Sleumerodendron	austrocaledonicum
Sorocephalus	alopecurus
Sorocephalus	capitatus
Sorocephalus	clavigerus
Sorocephalus	crassifolius
Sorocephalus	imbricatus
Sorocephalus	lanatus
Sorocephalus	palustris
Sorocephalus	pinifolius
Sorocephalus	scabridus
Sorocephalus	tenuifolius
Sorocephalus	teretifolius
Spatalla	argentea
Spatalla	barbigera
Spatalla	caudata
Spatalla	colorata
Spatalla	confusa
Spatalla	curvifolia
Spatalla	ericoides
Spatalla	incurva
Spatalla	longifolia
Spatalla	mollis
Spatalla	nubicola
Spatalla	parilis
Spatalla	prolifera
Spatalla	propinqua
Spatalla	racemosa
Spatalla	salsoloides
Spatalla	setacea
Spatalla	squamata
Spatalla	thyrsiflora
Spatalla	tulbaghensis
Sphalmium	racemosum
Stenocarpus	acacioides
Stenocarpus	angustifolius
Stenocarpus	comptonii
Stenocarpus	cryptocarpus
Stenocarpus	cunninghamii
Stenocarpus	davallioides
Stenocarpus	dumbeensis
Stenocarpus	gracilis
Stenocarpus	heterophyllus
Stenocarpus	intermedius
Stenocarpus	milnei
Stenocarpus	phyllodineus
Stenocarpus	reticulatus
Stenocarpus	rubiginosus
Stenocarpus	salignus
Stenocarpus	sinuatus
Stenocarpus	trinervis
Stenocarpus	tremuloides
Stenocarpus	umbellifer
Stenocarpus	verticis
Stenocarpus	villosus
Stirlingia	abrotanoides
Stirlingia	anethifolia
Stirlingia	divaricatissima
Stirlingia	latifolia
Stirlingia	seselifolia
Stirlingia	simplex
Stirlingia	tenuifolia
Strangea	linearis
Strangea	stenocarpoides
Strangea	cynanchicarpa
Symphionema	montanum
Symphionema	paludosum
Synaphea	acutiloba
Synaphea	aephynsa
Synaphea	bifurcata
Synaphea	boyaginensis
Synaphea	brachyceras
Synaphea	canaliculata
Synaphea	cervifolia
Synaphea	constricta
Synaphea	cuneata
Synaphea	damopsis
Synaphea	decorticans
Synaphea	decumbens
Synaphea	diabolica
Synaphea	divaricata
Synaphea	drummondii
Synaphea	endothrix
Synaphea	favosa
Synaphea	flabelliformis
Synaphea	flexuosa
Synaphea	floribunda
Synaphea	gracillima
Synaphea	grandis
Synaphea	hians
Synaphea	incurva
Synaphea	interioris
Synaphea	intricata
Synaphea	lesueurensis
Synaphea	macrophylla
Synaphea	media
Synaphea	nexosa
Synaphea	obtusata
Synaphea	odocoileops
Synaphea	oligantha
Synaphea	otiostigma
Synaphea	oulopha
Synaphea	pandurata
Synaphea	panhesya
Synaphea	parviflora
Synaphea	petiolaris
Synaphea	pinnata
Synaphea	platyphylla
Synaphea	polymorpha
Synaphea	polypodioides
Synaphea	preissii
Synaphea	quartzitica
Synaphea	rangiferops
Synaphea	recurva
Synaphea	reticulata
Synaphea	sparsiflora
Synaphea	spinulosa
Synaphea	stenoloba
Synaphea	tamminensis
Synaphea	trinacriformis
Synaphea	tripartita
Synaphea	whicherensis
Synaphea	xela
Telopea	aspera
Telopea	speciosissima
Telopea	mongaensis
Telopea	oreades
Telopea	truncata
Toronia	toru
Triunia	erythrocarpa
Triunia	montana
Triunia	robusta
Triunia	youngiana
Turrillia	lutea
Turrillia	ferruginea
Turrillia	vitiensis
Vexatorella	alpina
Vexatorella	amoena
Vexatorella	latebrosa
Vexatorella	obtusata
Virotia	angustifolia
Virotia	francii
Virotia	leptophylla
Virotia	neurophylla
Virotia	rousselii
Virotia	vieillardi
Xylomelum	pyriforme
Xylomelum	occidentale
Xylomelum	angustifolium
Xylomelum	cunninghamianum
Xylomelum	benthamii
Xylomelum	scottianum

## Sheet: Synonyms_S2b
Table S2b. List of all Proteaceae synonyms identified in this study
Original name / Synonym	Accepted / Revised Name	Source
Hakea acicularis Knight	Hakea sericea Schrad. & J.C.Wendl.	http://www.anbg.gov.au/cgi-bin/wintab, accessed 2011/08/23
Hakea bipinnatifida R.Br.	Hakea lissocarpha R.Br.	http://www.anbg.gov.au/cgi-bin/wintab, accessed 2011/08/23
Hakea saligna (Andrews) Knight	Hakea salicifolia (Vent.) B.L.Burtt	http://www.anbg.gov.au/cgi-bin/apclist, accessed 2011/08/23
Hakea suaveolens R.Br.	Hakea drupacea (C.F.Gaertn.) Roem. & Schult.	http://www.anbg.gov.au/cgi-bin/apclist, accessed 2011/08/23
Hakea tenuifolia (Salisb.) Britten	Hakea sericea Schrad. & J.C.Wendl.	http://www.anbg.gov.au/cgi-bin/wintab, accessed 2011/08/23
Hakea crassifolia Meisn.	Hakea pandanicarpa subsp. crassifolia (Meisn.) R.M.Barker	http://www.anbg.gov.au/cgi-bin/wintab, accessed 2011/04/26
Protea mellifera Thunb.	Protea repens (L.) L.	USDA, ARS, National Genetic Resources Program. Germplasm Resources Information Network - (GRIN) [Online Database]. National Germplasm Resources Laboratory, Beltsville, Maryland. URL: http://www.ars-grin.gov/cgi-bin/npgs/html/tax_search.pl?Protea%20mellifera, accessed 2011/08/23
Protea barbigera Meisn.	Protea magnifica Link.	http://www.theplantlist.org, accessed 20120208
Protea latifolia R. Br.	Protea eximia (Knight) Fourc.	http://www.ars-grin.gov/cgi-bin/npgs/html/taxon.pl?29806, accessed 2012/02/08
Protea minor (E.Phillips) Compton	Protea longifolia Andrews	Rebelo, A.G., Helme, N.A., Holmes, P.M., Forshaw, C.N., Richardson, S.H., Raimondo, D., Euston-Brown, D.I.W., Victor, J.E., Foden, W., Ebrahim, I., Bomhard, B., Oliver, E.G.H., Johns, A., van der Venter, J., van der Walt, R., von Witt, C., Low, A.B., Paterson-Jones, C., Rourke, J.P., Hitchcock, A.N., Potter, L., Vlok, J.H. & Pillay, D. 2006. Protea longifolia Andrews. National Assessment: Red Lis…
Protea pulchella Andrews	Protea burchellii Stapf	Rebelo, A.G., Helme, N.A., Holmes, P.M., Forshaw, C.N., Richardson, S.H., Raimondo, D., Euston-Brown, D.I.W., Victor, J.E., Foden, W., Ebrahim, I., Bomhard, B., Oliver, E.G.H., Johns, A., van der Venter, J., van der Walt, R., von Witt, C., Low, A.B., Paterson-Jones, C., Rourke, J.P., Hitchcock, A.N., Potter, L., Vlok, J.H. & Pillay, D. 2008. Protea burchellii Stapf. National Assessment: Red List …
Protea pulchra Rycroft	Protea burchellii Stapf	Rebelo, A.G., Helme, N.A., Holmes, P.M., Forshaw, C.N., Richardson, S.H., Raimondo, D., Euston-Brown, D.I.W., Victor, J.E., Foden, W., Ebrahim, I., Bomhard, B., Oliver, E.G.H., Johns, A., van der Venter, J., van der Walt, R., von Witt, C., Low, A.B., Paterson-Jones, C., Rourke, J.P., Hitchcock, A.N., Potter, L., Vlok, J.H. & Pillay, D. 2008. Protea burchellii Stapf. National Assessment: Red List …
Protea subpulchella Stapf	Protea burchellii Stapf.	The Plant List. 2010. http://www.theplantlist.org, accessed 2012/02/08
Protea macrocephala Thunb.	Protea coronata Lam.	The Plant List. 2010. http://www.theplantlist.org, accessed 2012/04/30
Grevillea glabella R.Br.	Grevillea rosmarinifolia subsp. glabella (R.Br.) Makinson	http://www.anbg.gov.au/cgi-bin/apclist, accessed 2011/08/23
Grevillea australis var. brevifolia Hook.f.	Grevillea australis R.Br.	http://www.anbg.gov.au/cgi-bin/wintab, accessed 2011/08/23
Grevillea chrysodendron R.Br.	Grevillea pteridifolia Knight	http://www.anbg.gov.au/cgi-bin/wintab, accessed 2011/08/25
Grevillea glabrata (Lindl.) Meisn.	Grevillea manglesii (Graham) Planch.	http://www.anbg.gov.au/cgi-bin/wintab, accessed 2011/08/25
Grevillea banksii var. forsteri Guilf.	Grevillea banksii R.Br.	http://www.anbg.gov.au/cgi-bin/wintab, accessed 2011/08/23
Grevillea diffusa subsp. evansiana (MacKee) McGill.	Grevillea evansiana MacKee	http://www.anbg.gov.au/cgi-bin/wintab, accessed 2012/02/08
Grevillea drummondii subsp. pimeleoides (W.Fitzg.) McGill.	Grevillea pimeleoides W.Fitzg.	http://www.anbg.gov.au/cgi-bin/wintab, accessed 2012/02/08
Grevillea linearis (Andrews) R.Br.	Grevillea linearifolia (Cav.) Druce	http://www.anbg.gov.au/cgi-bin/wintab, accessed 2011/08/25
Grevillea macrostylis F.Muell.	Grevillea tripartita subsp. macrostylis (F.Muell.) Makinson	http://www.anbg.gov.au/cgi-bin/wintab, accessed 2011/08/25
Grevillea ornithopoda Meisn.	Grevillea manglesii subsp. ornithopoda (Meisn.) McGill.	http://www.anbg.gov.au/cgi-bin/wintab, accessed 2011/08/25
Grevillea gibbosa R.Br.	Grevillea glauca Knight	http://www.anbg.gov.au/cgi-bin/wintab, accessed 2011/08/25
Grevillea juniperina f. sulphurea (A.Cunn.) I.K.Ferguson	Grevillea juniperina subsp. sulphurea (A.Cunn.) Makinson	http://www.anbg.gov.au/cgi-bin/wintab, accessed 2012/02/08
Grevillea ericifolia R.Br.	Grevillea lanigera A.Cunn. ex R.Br.	The Plant List. 2010. Version 1. Published on the internet; http://www.theplantlist.org/, accessed 2012/04/10
Grevillea punicea R.Br.	Grevillea speciosa (Knight) McGill.	http://www.anbg.gov.au/cgi-bin/wintab, accessed 2012/02/06
Grevillea williamsonii F.Muell.	Grevillea aquifolium Lindl.	What’s Its Name?, IBIS database, Australian National Herbarium, Australian Government, Canberra, viewed 7 June 2012, http://www.cpbr.gov.au/win/index.html, accessed 2012/02/08
Oreocallis pinnata (Maiden & Betche) Sleumer	Alloxylon pinnatum (Maiden & Betche) P.H.Weston & Crisp	http://www.anbg.gov.au/cgi-bin/wintab, accessed 2012/02/07
Oreocallis mucronata (Willd. ex Roem. & Schult.) Sleumer	Oreocallis grandiflora (Lam.) R. Br.	The Plant List. 2010. Version 1. Published on the internet; http://www.theplantlist.org/, accessed 2012/02/08
Banksia australis R.Br.	Banksia marginata Cav.	http://www.anbg.gov.au/cgi-bin/apni?taxon_id=54354, accessed 2012/02/08
Banksia patula R.Br.	Banksia marginata Cav.	http://www.anbg.gov.au/cgi-bin/apni, accessed 2012/02/08
Banksia collina R.Br.	Banksia spinulosa var. collina (R.Br.) A.S.George	http://www.anbg.gov.au/cgi-bin/wintab, accessed 2012/02/07
Banksia aspleniifolia Salisb.	Banksia oblongifolia Cav.	http://www.anbg.gov.au/cgi-bin/wintab, accessed 2012/02/11
Aulax pinifolia P.J.Bergius	Aulax cancellata (L.) Druce.	The Plant List. 2010. Version 1. Published on the internet; http://www.theplantlist.org/, accessed 2012/02/08
Aulax cneorifolia Knight	Aulax umbellata (Thunb.) R.Br.	The Plant List. 2010. Version 1. Published on the internet; http://www.theplantlist.org/, accessed 2012/02/08
Embothrium grandiflora Lam.	Oreocallis grandiflora (Lam.) R. Br.	The Plant List. 2010. Version 1. Published on the internet; http://www.theplantlist.org/, accessed 2012/02/08
Faurea speciosa (Welw.) Welw.	Faurea rochetiana (A. Rich.) Pic.Serm.	Hyde, M.A., Wursten, B.T. & Ballings, P. (2012). Flora of Zimbabwe: Species information: Faurea rochetiana. http://www.zimbabweflora.co.zw/speciesdata/species.php?species_id=120680, accessed 2012/02/07
Gevuina bleasdalei (F.Muell.) Sleumer	Bleasdalea bleasdalei (F.Muell.) A.C.Sm. & J.E.Haas	http://www.anbg.gov.au/cgi-bin/wintab, accessed 2012/02/07
Gevuina papuana (Diels) Sleumer	Bleasdalea papuana (Diels) Domin.	Weston, P.H. and Barker, N.P. 2008. A new suprageneric classification of the Proteaceae, with an annotated checklist of genera. Telopea, 11 (3): 314-344.
Leucadendron adscendens R. Br.	Leucadendron salignum R. Br.	http://www.theplantlist.org, accessed 2012/02/07
Leucadendron decurrens R.Br.	Leucadendron chamelaea (Lam.) I.Williams	http://www.theplantlist.org, accessed 2011/08/25
Leucadendron venosum R. Br.	Leucadendron daphnoides Meisn.	http://www.theplantlist.org, accessed 2012/02/08
Leucadendron stokoei Phillips	Leucadendron microcephalum Gand. & Schinz.	The Plant List. 2010. Version 1. Published on the internet; http://www.theplantlist.org/, accessed 2012/05/11
Leucospermum album Bond	Leucospermum bolusii E. Phillips.	http://www.theplantlist.org, accessed 2012/02/08
Leucospermum nutans R. Br.	Leucospermum cordifolium Fourc.	http://www.theplantlist.org, accessed 2012/02/08
Leucospermum ellipticum R. Br.	Leucospermum cuneiforme Rourke.	The Plant List. 2010. Version 1. Published on the internet; http://www.theplantlist.org/, accessed 2012/05/11
Mimetes lyrigera Salisb. ex Knight nom. superf.	Mimetes cucullatus R. Br.	http://www.theplantlist.org, accessed 2012/02/08
Roupala brasiliensis Klotzsch	Roupala montana var. paraensis (Huber) K.S. Edwards.	The Plant List. 2010. Version 1. Published on the internet; http://www.theplantlist.org/, accessed 2012/02/08
Roupala grossidentata Pittier	Roupala brachybotrys subsp. grossidentata (Pittier) Plana & Prance	The Plant List. 2010. Version 1. Published on the internet; http://www.theplantlist.org/, accessed 2012/02/08
Serruria gracilis Salisb. ex Knight	Serruria pinnata (Andr.) R.Br.	Rebelo, A.G., Helme, N.A., Holmes, P.M., Forshaw, C.N., Richardson, S.H., Raimondo, D., Euston-Brown, D.I.W., Victor, J.E., Foden, W., Ebrahim, I., Bomhard, B., Oliver, E.G.H., Johns, A., van der Venter, J., van der Walt, R., von Witt, C., Low, A.B., Paterson-Jones, C., Rourke, J.P., Hitchcock, A.N., Potter, L., Vlok, J.H. & Pillay, D. 2006. Serruria pinnata (Andr.) R.Br. National Assessment: Red…
Serruria barbigera Salisb. ex Knight	Serruria phylicoides (P.J.Bergius) R.Br.	Rebelo, A.G., Helme, N.A., Holmes, P.M., Forshaw, C.N., Richardson, S.H., Raimondo, D., Euston-Brown, D.I.W., Victor, J.E., Foden, W., Ebrahim, I., Bomhard, B., Oliver, E.G.H., Johns, A., van der Venter, J., van der Walt, R., von Witt, C., Low, A.B., Paterson-Jones, C., Rourke, J.P., Hitchcock, A.N., Potter, L., Vlok, J.H. & Pillay, D. 2006. Serruria phylicoides (P.J.Bergius) R.Br. National Asses…
Dryandra acanthopoda A.S.George	Banksia acanthopoda (A.S.George) A.R.Mast & K.R.Thiele	What’s Its Name?, IBIS database, Australian National Herbarium, Australian Government, Canberra, viewed 25 May 2012, http://www.cpbr.gov.au/win/index.html.
Dryandra anatona A.S.George	Banksia anatona (A.S.George) A.R.Mast & K.R.Thiele	What’s Its Name?, IBIS database, Australian National Herbarium, Australian Government, Canberra, viewed 25 May 2012, http://www.cpbr.gov.au/win/index.html.
Dryandra arborea C.A.Gardner	Banksia arborea (C.A.Gardner) A.R.Mast & K.R.Thiele	What’s Its Name?, IBIS database, Australian National Herbarium, Australian Government, Canberra, viewed 25 May 2012, http://www.cpbr.gov.au/win/index.html.
Dryandra arctotidis R.Br.	Banksia arctotidis (R.Br.) A.R.Mast & K.R.Thiele	What’s Its Name?, IBIS database, Australian National Herbarium, Australian Government, Canberra, viewed 25 May 2012, http://www.cpbr.gov.au/win/index.html.
Dryandra armata R.Br.	Banksia armata (R.Br.) A.R.Mast & K.R.Thiele	What’s Its Name?, IBIS database, Australian National Herbarium, Australian Government, Canberra, viewed 25 May 2012, http://www.cpbr.gov.au/win/index.html.
Dryandra aurantia A.S.George	Banksia aurantia (A.S.George) A.R.Mast & K.R.Thiele	What’s Its Name?, IBIS database, Australian National Herbarium, Australian Government, Canberra, viewed 25 May 2012, http://www.cpbr.gov.au/win/index.html.
Dryandra baxteri R.Br.	Banksia biterax A.R.Mast & K.R.Thiele	What’s Its Name?, IBIS database, Australian National Herbarium, Australian Government, Canberra, viewed 25 May 2012, http://www.cpbr.gov.au/win/index.html.
Dryandra bipinnatifida R.Br.	Banksia bipinnatifida (R.Br.) A.R.Mast & K.R.Thiele	What’s Its Name?, IBIS database, Australian National Herbarium, Australian Government, Canberra, viewed 25 May 2012, http://www.cpbr.gov.au/win/index.html.
Dryandra blechnifolia R.Br.	Banksia pellaeifolia A.R.Mast & K.R.Thiele	What’s Its Name?, IBIS database, Australian National Herbarium, Australian Government, Canberra, viewed 25 May 2012, http://www.cpbr.gov.au/win/index.html.
Dryandra borealis A.S.George	Banksia borealis (A.S.George) A.R.Mast & K.R.Thiele	What’s Its Name?, IBIS database, Australian National Herbarium, Australian Government, Canberra, viewed 25 May 2012, http://www.cpbr.gov.au/win/index.html.
Dryandra brownii Meisn.	Banksia brunnea A.R.Mast & K.R.Thiele	What’s Its Name?, IBIS database, Australian National Herbarium, Australian Government, Canberra, viewed 25 May 2012, http://www.cpbr.gov.au/win/index.html.
Dryandra calophylla R.Br.	Banksia calophylla (R.Br.) A.R.Mast & K.R.Thiele	What’s Its Name?, IBIS database, Australian National Herbarium, Australian Government, Canberra, viewed 25 May 2012, http://www.cpbr.gov.au/win/index.html.
Dryandra carlinoides Meisn.	Banksia carlinoides (Meisn.) A.R.Mast & K.R.Thiele	What’s Its Name?, IBIS database, Australian National Herbarium, Australian Government, Canberra, viewed 25 May 2012, http://www.cpbr.gov.au/win/index.html.
Dryandra catoglypta A.S.George	Banksia catoglypta (A.S.George) A.R.Mast & K.R.Thiele	What’s Its Name?, IBIS database, Australian National Herbarium, Australian Government, Canberra, viewed 25 May 2012, http://www.cpbr.gov.au/win/index.html.
Dryandra cirsioides Meisn.	Banksia cirsioides (Meisn.) A.R.Mast & K.R.Thiele	What’s Its Name?, IBIS database, Australian National Herbarium, Australian Government, Canberra, viewed 25 May 2012, http://www.cpbr.gov.au/win/index.html.
Dryandra columnaris A.S.George	Banksia columnaris (A.S.George) A.R.Mast & K.R.Thiele	What’s Its Name?, IBIS database, Australian National Herbarium, Australian Government, Canberra, viewed 25 May 2012, http://www.cpbr.gov.au/win/index.html.
Dryandra comosa Meisn.	Banksia comosa (Meisn.) A.R.Mast & K.R.Thiele	What’s Its Name?, IBIS database, Australian National Herbarium, Australian Government, Canberra, viewed 25 May 2012, http://www.cpbr.gov.au/win/index.html.
Dryandra concinna R.Br.	Banksia concinna (R.Br.) A.R.Mast & K.R.Thiele	What’s Its Name?, IBIS database, Australian National Herbarium, Australian Government, Canberra, viewed 25 May 2012, http://www.cpbr.gov.au/win/index.html.
Dryandra conferta Benth.	Banksia densa A.R.Mast & K.R.Thiele	What’s Its Name?, IBIS database, Australian National Herbarium, Australian Government, Canberra, viewed 25 May 2012, http://www.cpbr.gov.au/win/index.html.
Dryandra corvijuga A.S.George	Banksia corvijuga (A.S.George) A.R.Mast & K.R.Thiele	What’s Its Name?, IBIS database, Australian National Herbarium, Australian Government, Canberra, viewed 25 May 2012, http://www.cpbr.gov.au/win/index.html.
Dryandra cuneata R.Br.	Banksia obovata A.R.Mast & K.R.Thiele	What’s Its Name?, IBIS database, Australian National Herbarium, Australian Government, Canberra, viewed 25 May 2012, http://www.cpbr.gov.au/win/index.html.
Dryandra cynaroides C.A.Gardner	Banksia cynaroides (C.A.Gardner) A.R.Mast & K.R.Thiele	What’s Its Name?, IBIS database, Australian National Herbarium, Australian Government, Canberra, viewed 25 May 2012, http://www.cpbr.gov.au/win/index.html.
Dryandra cypholoba A.S.George	Banksia cypholoba (A.S.George) A.R.Mast & K.R.Thiele	What’s Its Name?, IBIS database, Australian National Herbarium, Australian Government, Canberra, viewed 25 May 2012, http://www.cpbr.gov.au/win/index.html.
Dryandra drummondii Meisn.	Banksia drummondii (Meisn.) A.R.Mast & K.R.Thiele	What’s Its Name?, IBIS database, Australian National Herbarium, Australian Government, Canberra, viewed 25 May 2012, http://www.cpbr.gov.au/win/index.html.
Dryandra echinata A.S.George	Banksia echinata (A.S.George) A.R.Mast & K.R.Thiele	What’s Its Name?, IBIS database, Australian National Herbarium, Australian Government, Canberra, viewed 25 May 2012, http://www.cpbr.gov.au/win/index.html.
Dryandra epimicta A.S.George	Banksia epimicta (A.S.George) A.R.Mast & K.R.Thiele	What’s Its Name?, IBIS database, Australian National Herbarium, Australian Government, Canberra, viewed 25 May 2012, http://www.cpbr.gov.au/win/index.html.
Dryandra erythrocephala C.A.Gardner	Banksia erythrocephala (C.A.Gardner) A.R.Mast & K.R.Thiele	What’s Its Name?, IBIS database, Australian National Herbarium, Australian Government, Canberra, viewed 25 May 2012, http://www.cpbr.gov.au/win/index.html.
Dryandra falcata R.Br.	Banksia falcata (R.Br.) A.R.Mast & K.R.Thiele	What’s Its Name?, IBIS database, Australian National Herbarium, Australian Government, Canberra, viewed 25 May 2012, http://www.cpbr.gov.au/win/index.html.
Dryandra fasciculata A.S.George	Banksia fasciculata (A.S.George) A.R.Mast & K.R.Thiele	What’s Its Name?, IBIS database, Australian National Herbarium, Australian Government, Canberra, viewed 25 May 2012, http://www.cpbr.gov.au/win/index.html.
Dryandra ferruginea Kippist ex Meisn.	Banksia rufa A.R.Mast & K.R.Thiele	What’s Its Name?, IBIS database, Australian National Herbarium, Australian Government, Canberra, viewed 25 May 2012, http://www.cpbr.gov.au/win/index.html.
Dryandra fililoba A.S.George	Banksia fililoba (A.S.George) A.R.Mast & K.R.Thiele	What’s Its Name?, IBIS database, Australian National Herbarium, Australian Government, Canberra, viewed 25 May 2012, http://www.cpbr.gov.au/win/index.html.
Dryandra foliolata R.Br.	Banksia foliolata (R.Br.) A.R.Mast & K.R.Thiele	What’s Its Name?, IBIS database, Australian National Herbarium, Australian Government, Canberra, viewed 25 May 2012, http://www.cpbr.gov.au/win/index.html.
Dryandra foliosissima C.A.Gardner	Banksia foliosissima (C.A.Gardner) A.R.Mast & K.R.Thiele	What’s Its Name?, IBIS database, Australian National Herbarium, Australian Government, Canberra, viewed 25 May 2012, http://www.cpbr.gov.au/win/index.html.
Dryandra formosa R.Br.	Banksia formosa (R.Br.) A.R.Mast & K.R.Thiele	What’s Its Name?, IBIS database, Australian National Herbarium, Australian Government, Canberra, viewed 25 May 2012, http://www.cpbr.gov.au/win/index.html.
Dryandra fraseri R.Br.	Banksia fraseri (R.Br.) A.R.Mast & K.R.Thiele	What’s Its Name?, IBIS database, Australian National Herbarium, Australian Government, Canberra, viewed 25 May 2012, http://www.cpbr.gov.au/win/index.html.
Dryandra fuscobractea A.S.George	Banksia fuscobractea (A.S.George) A.R.Mast & K.R.Thiele	What’s Its Name?, IBIS database, Australian National Herbarium, Australian Government, Canberra, viewed 25 May 2012, http://www.cpbr.gov.au/win/index.html.
Dryandra glauca A.S.George	Banksia glaucifolia A.R.Mast & K.R.Thiele	What’s Its Name?, IBIS database, Australian National Herbarium, Australian Government, Canberra, viewed 25 May 2012, http://www.cpbr.gov.au/win/index.html.
Dryandra hewardiana Meisn.	Banksia hewardiana (Meisn.) A.R.Mast & K.R.Thiele	What’s Its Name?, IBIS database, Australian National Herbarium, Australian Government, Canberra, viewed 25 May 2012, http://www.cpbr.gov.au/win/index.html.
Dryandra hirsuta A.S.George	Banksia hirta A.R.Mast & K.R.Thiele	What’s Its Name?, IBIS database, Australian National Herbarium, Australian Government, Canberra, viewed 25 May 2012, http://www.cpbr.gov.au/win/index.html.
Dryandra horrida Meisn.	Banksia horrida (Meisn.) A.R.Mast & K.R.Thiele	What’s Its Name?, IBIS database, Australian National Herbarium, Australian Government, Canberra, viewed 25 May 2012, http://www.cpbr.gov.au/win/index.html.
Dryandra idiogenes A.S.George	Banksia idiogenes (A.S.George) A.R.Mast & K.R.Thiele	What’s Its Name?, IBIS database, Australian National Herbarium, Australian Government, Canberra, viewed 25 May 2012, http://www.cpbr.gov.au/win/index.html.
Dryandra insulanemorecincta A.S.George	Banksia insulanemorecincta (A.S.George) A.R.Mast & K.R.Thiele	What’s Its Name?, IBIS database, Australian National Herbarium, Australian Government, Canberra, viewed 25 May 2012, http://www.cpbr.gov.au/win/index.html.
Dryandra ionthocarpa A.S.George	Banksia ionthocarpa (A.S.George) A.R.Mast & K.R.Thiele	What’s Its Name?, IBIS database, Australian National Herbarium, Australian Government, Canberra, viewed 25 May 2012, http://www.cpbr.gov.au/win/index.html.
Dryandra kippistiana Meisn.	Banksia kippistiana (Meisn.) A.R.Mast & K.R.Thiele	What’s Its Name?, IBIS database, Australian National Herbarium, Australian Government, Canberra, viewed 25 May 2012, http://www.cpbr.gov.au/win/index.html.
Dryandra lepidorhiza A.S.George	Banksia lepidorhiza (A.S.George) A.R.Mast & K.R.Thiele	What’s Its Name?, IBIS database, Australian National Herbarium, Australian Government, Canberra, viewed 25 May 2012, http://www.cpbr.gov.au/win/index.html.
Dryandra lindleyana Meisn.	Banksia dallanneyi A.R.Mast & K.R.Thiele	What’s Its Name?, IBIS database, Australian National Herbarium, Australian Government, Canberra, viewed 25 May 2012, http://www.cpbr.gov.au/win/index.html.
Dryandra longifolia R.Br.	Banksia prolata A.R.Mast & K.R.Thiele	What’s Its Name?, IBIS database, Australian National Herbarium, Australian Government, Canberra, viewed 25 May 2012, http://www.cpbr.gov.au/win/index.html.
Dryandra meganotia A.S.George	Banksia meganotia (A.S.George) A.R.Mast & K.R.Thiele	What’s Its Name?, IBIS database, Australian National Herbarium, Australian Government, Canberra, viewed 25 May 2012, http://www.cpbr.gov.au/win/index.html.
Dryandra mimica A.S.George	Banksia mimica (A.S.George) A.R.Mast & K.R.Thiele	What’s Its Name?, IBIS database, Australian National Herbarium, Australian Government, Canberra, viewed 25 May 2012, http://www.cpbr.gov.au/win/index.html.
Dryandra montana C.A.Gardner ex A.S.George	Banksia montana (C.A.Gardner ex A.S.George) A.R.Mast & K.R.Thiele	What’s Its Name?, IBIS database, Australian National Herbarium, Australian Government, Canberra, viewed 25 May 2012, http://www.cpbr.gov.au/win/index.html.
Dryandra mucronulata R.Br.	Banksia mucronulata (R.Br.) A.R.Mast & K.R.Thiele	What’s Its Name?, IBIS database, Australian National Herbarium, Australian Government, Canberra, viewed 25 May 2012, http://www.cpbr.gov.au/win/index.html.
Dryandra nana Meisn.	Banksia nana (Meisn.) A.R.Mast & K.R.Thiele	What’s Its Name?, IBIS database, Australian National Herbarium, Australian Government, Canberra, viewed 25 May 2012, http://www.cpbr.gov.au/win/index.html.
Dryandra nervosa R.Br.	Banksia alliacea A.R.Mast & K.R.Thiele	What’s Its Name?, IBIS database, Australian National Herbarium, Australian Government, Canberra, viewed 25 May 2012, http://www.cpbr.gov.au/win/index.html.
Dryandra nivea (Labill.) R.Br.	Banksia nivea Labill.	What’s Its Name?, IBIS database, Australian National Herbarium, Australian Government, Canberra, viewed 25 May 2012, http://www.cpbr.gov.au/win/index.html.
Dryandra nobilis Lindl.	Banksia nobilis (Lindl.) A.R.Mast & K.R.Thiele	What’s Its Name?, IBIS database, Australian National Herbarium, Australian Government, Canberra, viewed 25 May 2012, http://www.cpbr.gov.au/win/index.html.
Dryandra obtusa R.Br.	Banksia obtusa (R.Br.) A.R.Mast & K.R.Thiele	What’s Its Name?, IBIS database, Australian National Herbarium, Australian Government, Canberra, viewed 25 May 2012, http://www.cpbr.gov.au/win/index.html.
Dryandra octotriginta A.S.George	Banksia octotriginta (A.S.George) A.R.Mast & K.R.Thiele	What’s Its Name?, IBIS database, Australian National Herbarium, Australian Government, Canberra, viewed 25 May 2012, http://www.cpbr.gov.au/win/index.html.
Dryandra pallida A.S.George	Banksia pallida (A.S.George) A.R.Mast & K.R.Thiele	What’s Its Name?, IBIS database, Australian National Herbarium, Australian Government, Canberra, viewed 25 May 2012, http://www.cpbr.gov.au/win/index.html.
Dryandra platycarpa A.S.George	Banksia platycarpa (A.S.George) A.R.Mast & K.R.Thiele	What’s Its Name?, IBIS database, Australian National Herbarium, Australian Government, Canberra, viewed 25 May 2012, http://www.cpbr.gov.au/win/index.html.
Dryandra plumosa R.Br.	Banksia plumosa (R.Br.) A.R.Mast & K.R.Thiele	What’s Its Name?, IBIS database, Australian National Herbarium, Australian Government, Canberra, viewed 25 May 2012, http://www.cpbr.gov.au/win/index.html.
Dryandra polycephala Benth.	Banksia polycephala (Benth.) A.R.Mast & K.R.Thiele	What’s Its Name?, IBIS database, Australian National Herbarium, Australian Government, Canberra, viewed 25 May 2012, http://www.cpbr.gov.au/win/index.html.
Dryandra porrecta A.S.George	Banksia porrecta (A.S.George) A.R.Mast & K.R.Thiele	What’s Its Name?, IBIS database, Australian National Herbarium, Australian Government, Canberra, viewed 25 May 2012, http://www.cpbr.gov.au/win/index.html.
Dryandra praemorsa Meisn.	Banksia undata A.R.Mast & K.R.Thiele	What’s Its Name?, IBIS database, Australian National Herbarium, Australian Government, Canberra, viewed 25 May 2012, http://www.cpbr.gov.au/win/index.html.
Dryandra preissii Meisn.	Banksia acuminata A.R.Mast & K.R.Thiele	What’s Its Name?, IBIS database, Australian National Herbarium, Australian Government, Canberra, viewed 25 May 2012, http://www.cpbr.gov.au/win/index.html.
Dryandra prionotes A.S.George	Banksia prionophylla A.R.Mast & K.R.Thiele	What’s Its Name?, IBIS database, Australian National Herbarium, Australian Government, Canberra, viewed 25 May 2012, http://www.cpbr.gov.au/win/index.html.
Dryandra proteoides Lindl.	Banksia proteoides (Lindl.) A.R.Mast & K.R.Thiele	What’s Its Name?, IBIS database, Australian National Herbarium, Australian Government, Canberra, viewed 25 May 2012, http://www.cpbr.gov.au/win/index.html.
Dryandra pseudoplumosa A.S.George	Banksia pseudoplumosa (A.S.George) A.R.Mast & K.R.Thiele	What’s Its Name?, IBIS database, Australian National Herbarium, Australian Government, Canberra, viewed 25 May 2012, http://www.cpbr.gov.au/win/index.html.
Dryandra pteridifolia R.Br.	Banksia pteridifolia (R.Br.) A.R.Mast & K.R.Thiele	What’s Its Name?, IBIS database, Australian National Herbarium, Australian Government, Canberra, viewed 25 May 2012, http://www.cpbr.gov.au/win/index.html.
Dryandra pulchella Meisn.	Banksia bella A.R.Mast & K.R.Thiele	What’s Its Name?, IBIS database, Australian National Herbarium, Australian Government, Canberra, viewed 25 May 2012, http://www.cpbr.gov.au/win/index.html.
Dryandra purdieana Diels	Banksia purdieana (Diels) A.R.Mast & K.R.Thiele	What’s Its Name?, IBIS database, Australian National Herbarium, Australian Government, Canberra, viewed 25 May 2012, http://www.cpbr.gov.au/win/index.html.
Dryandra quercifolia Meisn.	Banksia heliantha A.R.Mast & K.R.Thiele	What’s Its Name?, IBIS database, Australian National Herbarium, Australian Government, Canberra, viewed 25 May 2012, http://www.cpbr.gov.au/win/index.html.
Dryandra rufistylis A.S.George	Banksia rufistylis (A.S.George) A.R.Mast & K.R.Thiele	What’s Its Name?, IBIS database, Australian National Herbarium, Australian Government, Canberra, viewed 25 May 2012, http://www.cpbr.gov.au/win/index.html.
Dryandra sclerophylla Meisn.	Banksia sclerophylla (Meisn.) A.R.Mast & K.R.Thiele	What’s Its Name?, IBIS database, Australian National Herbarium, Australian Government, Canberra, viewed 25 May 2012, http://www.cpbr.gov.au/win/index.html.
Dryandra seneciifolia R.Br.	Banksia seneciifolia (R.Br.) A.R.Mast & K.R.Thiele	What’s Its Name?, IBIS database, Australian National Herbarium, Australian Government, Canberra, viewed 25 May 2012, http://www.cpbr.gov.au/win/index.html.
Dryandra serra R.Br.	Banksia serra (R.Br.) A.R.Mast & K.R.Thiele	What’s Its Name?, IBIS database, Australian National Herbarium, Australian Government, Canberra, viewed 25 May 2012, http://www.cpbr.gov.au/win/index.html.
Dryandra serratuloides Meisn.	Banksia serratuloides (Meisn.) A.R.Mast & K.R.Thiele	What’s Its Name?, IBIS database, Australian National Herbarium, Australian Government, Canberra, viewed 25 May 2012, http://www.cpbr.gov.au/win/index.html.
Dryandra sessilis (Knight) Domin	Banksia sessilis (Knight) A.R.Mast & K.R.Thiele	What’s Its Name?, IBIS database, Australian National Herbarium, Australian Government, Canberra, viewed 25 May 2012, http://www.cpbr.gov.au/win/index.html.
Dryandra shanklandiorum Randall	Banksia shanklandiorum (Randall) A.R.Mast & K.R.Thiele	What’s Its Name?, IBIS database, Australian National Herbarium, Australian Government, Canberra, viewed 25 May 2012, http://www.cpbr.gov.au/win/index.html.
Dryandra shuttelworthiana Meisn.	Banksia shuttleworthiana (Meisn.) A.R.Mast & K.R.Thiele	What’s Its Name?, IBIS database, Australian National Herbarium, Australian Government, Canberra, viewed 25 May 2012, http://www.cpbr.gov.au/win/index.html.
Dryandra speciosa Meisn.	Banksia splendida A.R.Mast & K.R.Thiele	What’s Its Name?, IBIS database, Australian National Herbarium, Australian Government, Canberra, viewed 25 May 2012, http://www.cpbr.gov.au/win/index.html.
Dryandra squarrosa R.Br.	Banksia squarrosa (R.Br.) A.R.Mast & K.R.Thiele	What’s Its Name?, IBIS database, Australian National Herbarium, Australian Government, Canberra, viewed 25 May 2012, http://www.cpbr.gov.au/win/index.html.
Dryandra stenoprion Meisn.	Banksia stenoprion (Meisn.) A.R.Mast & K.R.Thiele	What’s Its Name?, IBIS database, Australian National Herbarium, Australian Government, Canberra, viewed 25 May 2012, http://www.cpbr.gov.au/win/index.html.
Dryandra stricta A.S.George	Banksia strictifolia A.R.Mast & K.R.Thiele	What’s Its Name?, IBIS database, Australian National Herbarium, Australian Government, Canberra, viewed 25 May 2012, http://www.cpbr.gov.au/win/index.html.
Dryandra stuposa Lindl.	Banksia stuposa (Lindl.) A.R.Mast & K.R.Thiele	What’s Its Name?, IBIS database, Australian National Herbarium, Australian Government, Canberra, viewed 25 May 2012, http://www.cpbr.gov.au/win/index.html.
Dryandra subpinnatifida C.A.Gardner	Banksia subpinnatifida (C.A.Gardner) A.R.Mast & K.R.Thiele	What’s Its Name?, IBIS database, Australian National Herbarium, Australian Government, Canberra, viewed 25 May 2012, http://www.cpbr.gov.au/win/index.html.
Dryandra subulata C.A.Gardner	Banksia subulata (C.A.Gardner) A.R.Mast & K.R.Thiele	What’s Its Name?, IBIS database, Australian National Herbarium, Australian Government, Canberra, viewed 25 May 2012, http://www.cpbr.gov.au/win/index.html.
Dryandra tenuifolia R.Br.	Banksia tenuis A.R.Mast & K.R.Thiele	What’s Its Name?, IBIS database, Australian National Herbarium, Australian Government, Canberra, viewed 25 May 2012, http://www.cpbr.gov.au/win/index.html.
Dryandra tortifolia Kippist ex Meisn.	Banksia tortifolia (Kippist ex Meisn.) A.R.Mast & K.R.Thiele	What’s Its Name?, IBIS database, Australian National Herbarium, Australian Government, Canberra, viewed 25 May 2012, http://www.cpbr.gov.au/win/index.html.
Dryandra tridentata Meisn.	Banksia tridentata (Meisn.) B.D.Jacks.	What’s Its Name?, IBIS database, Australian National Herbarium, Australian Government, Canberra, viewed 25 May 2012, http://www.cpbr.gov.au/win/index.html.
Dryandra trifontinalis A.S.George	Banksia trifontinalis (A.S.George) A.R.Mast & K.R.Thiele	What’s Its Name?, IBIS database, Australian National Herbarium, Australian Government, Canberra, viewed 25 May 2012, http://www.cpbr.gov.au/win/index.html.
Dryandra vestita Meisn.	Banksia vestita (Kippist ex Meisn.) A.R.Mast & K.R.Thiele	What’s Its Name?, IBIS database, Australian National Herbarium, Australian Government, Canberra, viewed 25 May 2012, http://www.cpbr.gov.au/win/index.html.
Dryandra viscida A.S.George	Banksia viscida (A.S.George) A.R.Mast & K.R.Thiele	What’s Its Name?, IBIS database, Australian National Herbarium, Australian Government, Canberra, viewed 25 May 2012, http://www.cpbr.gov.au/win/index.html.
Dryandra wonganensis A.S.George	Banksia wonganensis (A.S.George) A.R.Mast & K.R.Thiele	What’s Its Name?, IBIS database, Australian National Herbarium, Australian Government, Canberra, viewed 25 May 2012, http://www.cpbr.gov.au/win/index.html.
Dryandra xylothemelia A.S.George	Banksia xylothemelia (A.S.George) A.R.Mast & K.R.Thiele	What’s Its Name?, IBIS database, Australian National Herbarium, Australian Government, Canberra, viewed 25 May 2012, http://www.cpbr.gov.au/win/index.html.
Persoonia toru A. Cunn.	Toronia toru (A. Cunn.) L.A.S. Johnson & B.G. Briggs	The Plant List. 2010. Version 1. Published on the internet; http://www.theplantlist.org/, accessed 2012/05/11
