# Supplementary material for: Different Traits Determine Introduction, Naturalization and Invasion Success In Woody Plants: Proteaceae as a Test Case
Source: PLoS One. 2013 Sep 24;8(9):e75078. doi: 10.1371/journal.pone.0075078 (PMC3782508; doi:10.1371/journal.pone.0075078)
Supplement: Table S5 — Significance of native range size (km2) in the linear regression model fitted to species regions of origin. Native range size differed significantly between Australia and other regions of origin. (XLS) [file pone.0075078.s008.xls]

## Sheet: Sheet1
Table S5. Significance of native range size (km2) in the linear regression model fitted to species regions of origin. Native range size differed significantly between Australia and other regions of origin.
Coefficients	Estimate	Standard error	t - value	p- value
Intercept	8.384	0.172	48.7	< 0.05
Region of origin	2.771	0.233	11.87	< 0.05
